1 **Molecular epidemiology of mumps viruses detected in the Netherlands, 2017-2019**

2

3 Rogier Bodewes<sup>1#</sup>, Linda Reijnen<sup>1</sup>, Jeroen Kerkhof<sup>1</sup>, Jeroen Cremer<sup>1</sup>, Dennis Schmitz<sup>1</sup>, Rob van  
4 Binnendijk<sup>1</sup> and Irene K. Veldhuijzen<sup>1</sup>

5

6 <sup>1</sup> Centre for Infectious Disease Control, National Institute for Public Health and the Environment  
7 (RIVM), Bilthoven, the Netherlands

8

9 # Corresponding author:

10 Rogier Bodewes, PhD

11 National Institute for Public Health and the Environment (RIVM)

12 Antonie van Leeuwenhoeklaan 9, 3721 MA Bilthoven, the Netherlands

13 T: 0031(0)302742750

14 E: [rogier.bodewes@rivm.nl](mailto:rogier.bodewes@rivm.nl)

## 15 **Abstract**

16 Mumps cases continue to occur, also in countries with a relatively high vaccination rate. The last major  
17 outbreaks of mumps in the Netherlands were from 2009-2012 and thereafter, only small clusters and  
18 single cases were reported. Molecular epidemiology can provide insights in the circulation of mumps  
19 viruses. The aims of the present study were to analyze the molecular epidemiology of mumps viruses in  
20 the Netherlands in 2017-2019 and to elucidate whether complete genome sequencing adds to the  
21 molecular resolution of mumps viruses when compared to sequencing of the mumps SH gene and non-  
22 coding regions (SH+NCRs). To this end, Sanger sequence data from the SH+NCRs were analyzed from  
23 82 mumps genotype G viruses. In addition, the complete genomes were obtained from 10 mumps virus  
24 isolates using next-generation sequencing. Analysis of SH+NCRs of mumps viruses revealed the presence  
25 of two major lineages in the Netherlands, which was confirmed by analysis of complete genomes.  
26 Comparison of molecular resolution obtained with SH+NCRs and complete genomes clearly indicated  
27 that additional molecular resolution can be obtained by analyzing complete genomes. In conclusion,  
28 analysis of SH + NCRs sequence data from recent mumps genotype G viruses indicate that mumps  
29 viruses continue to circulate in the Netherlands and surrounding countries. However, to understand exact  
30 transmission trees and to compare mumps viruses on a large geographic scale, analysis of complete  
31 genomes is a very useful approach.

## 32 **Introduction**

33

34 Mumps viruses are single stranded negative-sense RNA viruses belonging to the genus *Orthorubulavirus*  
35 of the family of *Paramyxoviridae*. Infection of humans with mumps virus results in acute illness which is  
36 usually characterized by a temporary unilateral or bilateral parotitis. Occasionally, mumps virus infections  
37 can result in serious complications [1, 2], but infections with mumps virus also often do not result in  
38 recognized clinical signs [1, 3].

39 In 1987, vaccination against mumps virus was implemented in the National Immunization Program in the  
40 Netherlands. Although this resulted in a rapid decline of mumps cases, in recent years multiple outbreaks  
41 occurred mainly among vaccinated young adults [4, 5]. From 2013 until 2020, multiple small local  
42 outbreaks and individual mumps cases were reported in the Netherlands.

43 Molecular epidemiology can provide insights in the circulation of mumps viruses. Sequencing of the SH  
44 gene and adjacent non-coding regions provides information about the genotype and some information of  
45 the circulating strains [6, 7]. Increasing the molecular resolution by obtaining additional sequence data of  
46 mumps viruses has proven useful in defining different transmission chains and local clusters [6, 8, 9]. In  
47 this context, sequencing of the hemagglutinin-neuraminidase protein gene (HN) and fusion protein gene  
48 (F) provides similar sequence resolution compared to sequencing of the sum of three the non-coding  
49 regions (NCRs), present between the nucleocapsid protein and phosphoprotein (N-P), between  
50 phosphoprotein and matrix protein (P-M) and between matrix protein gene and F gene (M-F). While both  
51 contributes to the molecular resolution, sequencing of the complete genome might provide the more  
52 complete resolution that is necessary to compare mumps viruses on a larger geographic scale and identify  
53 exact transmission chains [10-14].

54 The aims of the present study were to analyze the molecular epidemiology of mumps viruses in the  
55 Netherlands in 2017-2019 and to elucidate whether complete genome sequencing adds to the molecular

56 resolution of mumps viruses when compared to direct sequencing of the mumps SH gene and NCRs. To  
57 this end, we investigated all typable specimens generated from the isolated viruses of molecular  
58 confirmed mumps cases in the Netherlands from 2017 to 2019.

## 59 **Materials and methods**

60

### 61 **Sample collection and Sanger sequencing**

62 Clinical samples were obtained from mumps cases in the Netherlands that were notified under the Public  
63 Health Act in the Netherlands. Samples were send to the National Institute for Public Health and the  
64 Environment (RIVM) for molecular surveillance. Sequencing of the SH region and the non-coding  
65 regions (NCRs) between the N-P, P-M and M-F genes was performed directly on clinical materials as  
66 described previously [6, 7].

67

### 68 **Virus isolation**

69 In total 73 clinical materials (oral fluid, throat swabs and urine) were used for virus isolation. Confluent  
70 Vero cells (ECACC 84113001) in 24 wells plates (Greiner bio-one) were inoculated with clinical material  
71 (5µl oral fluid, 10µl urine or 50µl throat swab medium) and cells were incubated for one hour at 37°C/5%  
72 CO<sub>2</sub>. Subsequently, 1 ml of Dulbecco's Modified Eagle Medium (DMEM, Gibco) was added  
73 supplemented with 100U/ml Pen-Strep (Lonza), 2 mM L-Glutamine (Lonza), 12.5 µg/ml Amphotericin B  
74 (Biowest) and 24 units/ml Nystatin suspension (Sigma) and plates were incubated at 37°C/5% CO<sub>2</sub>. Wells  
75 were checked daily for the presence of cytopathic effect (CPE). If no CPE was present after 5 days, cells  
76 were trypsinized (0.25% Trypsin-EDTA(1X) Gibco) and subsequently about 1/3 of trypsinized cells were  
77 transferred to another well and fresh medium was added. Again, cells were checked daily for the presence  
78 of CPE. If no CPE was present for 12 days after the start of the first incubation, culture was considered  
79 negative. If CPE was detected, medium was harvested and subsequently passaged one or two times over  
80 confluent Vero cells to produce large virus stocks (T25 cm<sup>2</sup> flask or T75 cm<sup>2</sup> flask, Corning).

81

82 **Next-generation sequencing**

83 Mumps virus isolates were processed for full genome sequencing using a viral metagenomics approach.  
84 To this end, 200µl of each cell culture supernatant was pretreated and processed for next-generation  
85 sequencing using the Illumina NextSeq 550 platform essentially as described elsewhere [15](Benschop et  
86 al, manuscript in prep). Bioinformatic analysis of obtained reads was performed using the Jovian pipeline  
87 (Schmitz *et al*, manuscript in prep).

88

89 **Genetic and phylogenetic analysis**

90 Obtained sequence data were aligned manually in MEGA7 and phylogenetic analysis was performed  
91 using the maximum-likelihood method with the Hasegawa-Kishino-Yano model and 500 bootstrap  
92 replicates [16]. Multiple closely related or mumps virus strains were added to the alignments for  
93 comparison.

94 **Results**

95

96 **Mumps cases in 2017, 2018 and 2019 in the Netherlands**

97 Between January 2017 and October 2019, 246 mumps cases were notified in the Netherlands based on  
98 clinical symptoms and laboratory confirmation, or an epidemiological link with a laboratory confirmed  
99 case. A mumps virus genotype could be determined for 123 cases (50%), of which 108 cases (88%)  
100 belonged to genotype G. The other 15 cases belonged to either genotype C (five cases), D (one case), H  
101 (seven cases), J (one case) or K (one case). From in total 82 mumps genotype G cases could NCRs  
102 sequence data be obtained in addition to the SH sequence used for genotyping (Genbank accession  
103 numbers MT238691-MT238955).

104

105 **Virus isolation**

106 Inoculation of 9 throat swabs and one oral fluid specimen (14%) resulted in a mumps virus isolate as  
107 determined by the presence of cytopathic effect. Eight mumps virus isolates belonged to genotype G,  
108 while the other two mumps virus isolates belonged to genotype C or K (**Table 1**). Near complete  
109 genomes were obtained from all isolates, with genome sizes ranging from 15144 to 15375 nucleotides  
110 (Genbank accession numbers MT238681-MT238690).

111

112

113

114

115 **Table 1.** Overview of metadata of mumps virus isolates

| <b>Isolate</b>              | <b>Clinical specimen</b> | <b>Epidemiological link</b>                                                                                | <b>Genotype</b> | <b>Mean read coverage</b> |
|-----------------------------|--------------------------|------------------------------------------------------------------------------------------------------------|-----------------|---------------------------|
| MuVi/Amsterdam.NLD/29.17/1  | Throat swab              | Southern Europe, travelling.                                                                               | G               | 3200*                     |
| MuVi/Beugen.NLD/16.18       | Throat swab              | The Netherlands, unknown.                                                                                  | G               | 4300                      |
| MuVi/Eindhoven.NLD/42.18    | Oral fluid               | The Netherlands, cluster among students at a university.                                                   | G               | 550                       |
| MuVi/Utrecht.NLD/8.19       | Throat swab              | Southeast Asia, travelling.                                                                                | K               | 2000                      |
| MuVi/Noord-Holland.NLD/9.19 | Throat swab              | The Netherlands, unknown.                                                                                  | G               | 2500                      |
| MuVi/Deventer.NLD/12.19     | Throat swab              | The Netherlands, cluster among students at a university.                                                   | G               | 2300                      |
| MuVi/Utrecht.NLD/15.19      | Throat swab              | The Netherlands, contact with students at an university, possibly same cluster as MuVi/Deventer.NLD/12.19. | G               | 480                       |
| MuVi/Utrecht.NLD/21.19      | Throat swab              | East-Asia, travelling.                                                                                     | C               | 1400                      |
| MuVi/Gelderland.NLD/26.19   | Throat swab              | The Netherlands, work.                                                                                     | G               | 3700                      |
| MuVi/Utrecht.NLD/35.19      | Throat swab              | The Netherlands, unknown.                                                                                  | G               | 2600                      |

116 \*if the sequence consisted of two or more overlapping contigs by de-novo assembly, the mean coverage  
 117 of the contig with the lowest coverage is indicated.

118

119 **Comparison of sequencing data of isolates with original materials**

120 Comparison of nucleotide sequence data of the SH gene and adjacent NCRs and N-P, P-M and M-F  
 121 NCRs obtained from mumps viruses detected in clinical materials by Sanger sequencing with the  
 122 consensus sequence data from isolates obtained by NGS revealed in total three differences. At position  
 123 194 of the SH gene of MuVi/Deventer.NLD/12.19 a C was present, while a T was detected at that  
 124 position in the original material of MuVs/Deventer.NLD/12.19. Sanger sequencing confirmed the  
 125 presence of a T at this position in the original clinical sample. Additional Sanger sequencing revealed the  
 126 nucleotide shift from T to C was already present after the first passage.



127 At position 442 of the N-P NCR, a C was detected in the sequence data from  
128 MuVi/Amsterdam.NLD/29.17/1, while an A was detected in the sequence data obtained from the original  
129 material (MuVs/Amsterdam.NLD/29.17/1). Since this nucleotide position was in the phosphoprotein, this  
130 nucleotide change resulted also in an amino acid change (lysine to glutamine). The presence of the A in  
131 the original material was confirmed by Sanger sequencing. Additional Sanger sequencing analyses of the  
132 various passages indicated that the C was already detected at this position as a minor variant after the first  
133 passage, while two peaks of equal size were detected after the second passage. In the P-M NCR of  
134 MuVs/Utrecht.NLD/35.19, two peaks of similar size (A/G) were detected in the Sanger sequence data  
135 (both forward and reverse sequence), while the consensus sequence of MuVi/Utrecht.NLD/35.19 was a G  
136 at that position. This nucleotide position was also in the phosphoprotein, but this nucleotide difference did  
137 not result in an amino acid change. Additional analysis of the first passage and second passage of this  
138 isolate by Sanger sequencing indicated that in all these passages both nucleotide variants were present  
139 with two peaks of equal size. No other nucleotide differences were detected between the sequence data  
140 obtained from the original materials and the isolates.

141

#### 142 **Phylogenetic analysis of concatenated SH+NCRs sequences**

143 Phylogenetic analysis of concatenated SH+NCRs mumps genotype G virus sequences (Genbank  
144 accession numbers) indicated that two main lineages of genotype G virus strains were present in the  
145 Netherlands in 2017-2019 with respectively 50 and 17 mumps viruses (**Figure 1**), which differed by in  
146 total 8 nucleotides in the SH and NCRs. Viruses of the first lineage were only detected in the second half  
147 of 2018 and 2019, while viruses from the second lineage were detected in 2017, 2018 and 2019. Another  
148 lineage of mumps genotype G viruses consisted of 6 cases but within this group more sequence variation  
149 was present (lineage 3). Within these three lineages, multiple sequence variants were detected in the  
150 Netherlands, of which a number belonged to known epidemiological clusters. In addition, various other

151 virus variants were detected in the Netherlands in 2017, 2018 and 2019, but these variants were only  
152 detected in a limited amount of cases. Eight out of 15 of these viruses were collected from persons that  
153 were infected abroad. The presence of two main lineages was confirmed by analysis of (near) complete  
154 genomes of mumps viruses detected in these cases (**Figure 2**).

155

156 **Figure 1.** *Phylogenetic analysis of concatenated sequence data of SH and NCRs of mumps viruses*  
157 *detected in the Netherlands from 2017-2019. Only bootstrap values >70 are indicated. The main lineages*  
158 *of mumps viruses based on phylogenetic analysis are indicated with I, II and III.*

159 **Figure 2.** *Comparison of molecular resolution obtained by analysis of SH and NCRs and complete*  
160 *genomes. Phylogenetic analysis was performed on complete genomes of isolates of mumps genotype G*  
161 *viruses and results were compared with SH+NCRs data obtained from the same set of mumps viruses*  
162 *detected in clinical materials. Please note that one nucleotide difference was detected in mumps virus*  
163 *isolates MuVi/Deventer.NLD/12.19, MuVi/Amsterdam.NLD/29.17/1 and MuVi/Utrecht.NLD/35.19 in the*  
164 *SH and NCRs compared to the sequences from mumps viruses detected in the clinical materials. Only*  
165 *bootstrap values >70 are indicated.*

166

## 167 **Comparison of molecular resolution of SH+NCRs and complete genomes**

168 Comparison of the molecular resolution provided by concatenated SH+NCRs sequences and (near)  
169 complete genomes revealed that there was an increase in molecular resolution if (near) complete genomes  
170 were analyzed.. For example, one nucleotide difference was present between the SH+NCRs sequences of  
171 MuVi/Amsterdam.NLD/29.17/1 and MuVi/Beugen.NLD/16.18, while 16 nucleotide differences were  
172 present between the isolated complete genomes of these two viruses. Furthermore,  
173 MuVs/Deventer.NLD/12.19 and MuVs/Utrecht.NLD/15.19 were identical for SH+NCRs sequences, but

174 four nucleotide differences were present between the complete genomes of these isolated viruses. Also  
175 SH+NCRs sequences of MuVs/Utrecht.NLD/35.19 and MuVs/Eindhoven.NLD/42.18/1 were identical,  
176 while 11 nucleotide differences were detected by analysis of complete genomes. Although similar  
177 branching was observed in phylogenetic trees prepared by analysis of concatenated SH+NCRs and  
178 complete genomes, some differences were detected between the positions of  
179 MuVs/Gelderland.NLD/26.19/2 and MuVs/Noord-Holland.NLD/9.19 in the SH+NCR tree and the  
180 complete genome tree (**Figure 2**).

181

### 182 **Phylogenetic analysis of near complete mumps viruses**

183 Pairwise identity analysis on the nucleotide level of mumps genotype G viruses of the complete genomes  
184 of the MuVi/Gelderland.NLD/26.19/2, MuVi/Utrecht.NLD/35.19, MuVi/Eindhoven.NLD/42.18 and  
185 MuVi/Noord-Holland.NLD/9.19 indicated that these viruses were most closely related to  
186 MuVs/Michigan.USA/4.16 (99.91%). MuVi/Amsterdam.NLD/29.17/1, MuVi/Beugen.NLD/16.18,  
187 MuVi/Deventer.NLD/12.19 and MuVi/Utrecht.NLD.15.19 were most closely related to  
188 MuVs/Montana.USA/11.16 and MuVs/Illinois.USA/26.15/2 (99.63%). In addition, genotype K virus  
189 MuVi/Utrecht.NLD/8.19 was most closely related to MuVs/Massachusetts.USA/24.17/5[K] (99.37%) and  
190 genotype C virus MuVi/Utrecht.NLD/21.19 was most closely related to MuVi/Kushinagar.IND/36/13[C]  
191 (99.01%) (**Figure 3**).

192

193 **Figure 3. Phylogenetic analysis of complete mumps virus genomes.** *Phylogenetic analysis was*  
194 *performed on complete genomes of mumps virus isolated detected in the Netherlands and various closely*  
195 *related and representative mumps viruses with the HKY model and 100 bootstrap replicates. Only*  
196 *bootstrap values >70 are indicated. Mumps viruses detected in the Netherlands are indicated in bold.*  
197 *Genotypes to which these viruses belong are indicated.*

## 198 **Discussion**

199

200 Mumps cases continue to occur, also in countries with a relatively high vaccination rate. While in various  
201 countries recently large outbreaks were reported among young adults, the last major outbreaks of mumps  
202 in the Netherlands were from 2009-2012. Thereafter, only small clusters and single cases were reported  
203 [17].

204 Use of molecular epidemiology could contribute to the understanding of mumps virus circulation, also in  
205 countries or regions without major outbreaks. Therefore, the molecular epidemiology of mumps virus was  
206 studied using SH+NCRs mumps virus sequences obtained from mumps cases in the Netherlands in 2017-  
207 2019. Analysis of these regions with the relatively highest variation of mumps viruses revealed the  
208 presence of two major lineages in the Netherlands. The presence of these two lineages was confirmed by  
209 analysis of near complete genomes of a selection of these mumps viruses.

210 The presence of two lineages with multiple closely related mumps viruses in recent years, suggests that  
211 there was endemic transmission of mumps in the Netherlands and surrounding countries. This is  
212 supported by the fact that complete genomes of both lineages are distinct from mumps viruses detected  
213 recently in mainly the United States of America and Canada [10, 18]. Of interest, viruses of the first  
214 lineage were not detected before the second part of 2018, suggesting that this lineage emerged recently in  
215 the Netherlands.

216 In addition to viruses from these two lineages, multiple viruses were detected that had several nucleotide  
217 differences compared to viruses from these two lineages. Most likely, these viruses are currently not  
218 circulating in the Netherlands and surrounding countries, but were collected from solitary import cases or  
219 small clusters after initial import. This is supported in most cases by epidemiological data. Furthermore,  
220 mumps viruses were detected with other mumps genotypes than genotype G. Since these mumps viruses

221 were detected only in a relatively small proportion, these viruses were most likely not endemic in the  
222 Netherlands in recent years.

223 Of interest, comparison of NCR+SH sequence data from original materials with that of isolates indicated  
224 that passaging of mumps viruses over cells resulted in three nucleotide changes in total. Since the  
225 sequence of 2270 nucleotides of in 10 total viruses were compared, it was calculated that 0.013% of all  
226 nucleotide positions changed due to passaging (~2 nucleotide changes for a full mumps virus genome).  
227 Although analysis of these partial genomes indicate that passaging of mumps viruses results in nucleotide  
228 changes, this indicates that there is no major concern to use isolates for molecular surveillance studies in  
229 general. However, sequence data from isolates should be interpreted carefully if used to understand exact  
230 transmission trees. To study transmission trees, preferably original materials or eventually viruses that are  
231 passaged only a single time over cells are used.

232 Comparison of molecular resolution obtained with SH+NCRs and complete genomes clearly indicated  
233 that additional molecular resolution can be obtained by analyzing complete genomes. Main mumps  
234 clusters in recent years in the Netherlands could be identified by analysis of SH+NCRs data. However,  
235 NCR+SH sequence data cannot be used to study exact transmission trees, which is possible for mumps  
236 virus if complete genomes are analyzed [10, 18].

237 Most mumps viruses from which a complete genome was obtained in this study were collected from  
238 mumps cases that occurred several months after each other, and therefore it cannot be concluded whether  
239 these viruses are part of the same transmission chain. However, mumps viruses MuVi/Noord-  
240 Holland.NLD/9.19, MuVi/Deventer.NLD/12.19 and MuVi/Utrecht.NLD.15.19 were collected within 6  
241 weeks. While the sequence of MuVi/Noord-Holland.NLD/9.19 was relatively distinct from the other two  
242 viruses, between MuVi/Utrecht.NLD.15.19 and MuVi/Deventer.NLD/12.19 were only 4 nucleotide  
243 differences present. Since both mumps cases also lived in the same city, they were most likely part of the  
244 same mumps cluster, but there was no direct epidemiological link between these two cases.

245 In conclusion, analysis of SH + NCRs sequence data from recent mumps genotype G viruses indicate that  
246 mumps viruses continue to circulate in the Netherlands and surrounding countries. However, to  
247 understand exact transmission trees and to compare mumps viruses on a large geographic scale, analysis  
248 of complete genomes is a very useful approach.

249

## 250 **Acknowledgements**

251 The authors wish to thank medical microbiological laboratories and municipal health services for  
252 collecting and submitting clinical specimens that are used in this study and Tim Severs and Harry  
253 Vennema for setting-up NGS protocols.

## 254 **References**

255

- 256 1. Philip RN, Reinhard KR, Lackman DB. Observations on a mumps epidemic in a "virgin" population. 1958.  
257 *Am J Epidemiol.* 1995;142(3):233-53; discussion 1-2. PubMed PMID: 7631629.
- 258 2. Zamir CS, Schroeder H, Shoob H, Abramson N, Zentner G. Characteristics of a large mumps outbreak:  
259 Clinical severity, complications and association with vaccination status of mumps outbreak cases. *Hum Vaccin*  
260 *Immunother.* 2015;11(6):1413-7. doi: 10.1080/21645515.2015.1021522. PubMed PMID: 25874726; PubMed  
261 Central PMCID: PMC4514179.
- 262 3. Dittrich S, Hahne S, van Lier A, Kohl R, Boot H, Koopmans M, et al. Assessment of serological evidence  
263 for mumps virus infection in vaccinated children. *Vaccine.* 2011;29(49):9271-5. Epub 2011/10/11. doi:  
264 10.1016/j.vaccine.2011.09.072. PubMed PMID: 21983156.
- 265 4. Hirasing RA, Schaapveld K. [Vaccination against mumps successful]. *Ned Tijdschr Geneeskd.*  
266 1993;137(30):1498-500. PubMed PMID: 8366936.
- 267 5. Sane J, Gouma S, Koopmans M, de Melker H, Swaan C, van Binnendijk R, et al. Epidemic of mumps  
268 among vaccinated persons, The Netherlands, 2009-2012. *Emerg Infect Dis.* 2014;20(4):643-8. doi:  
269 10.3201/eid2004.131681. PubMed PMID: 24655811; PubMed Central PMCID: PMC3966393.
- 270 6. Gavilan AM, Fernandez-Garcia A, Rueda A, Castellanos A, Masa-Calles J, Lopez-Perea N, et al. Genomic  
271 non-coding regions reveal hidden patterns of mumps virus circulation in Spain, 2005 to 2015. *Euro Surveill.*  
272 2018;23(15). doi: 10.2807/1560-7917.ES.2018.23.15.17-00349. PubMed PMID: 29667574.
- 273 7. Bodewes R, van Rooijen K, Cremer J, Veldhuijzen IK, van Binnendijk R. Optimizing molecular  
274 surveillance of mumps genotype G viruses. *Infect Genet Evol.* 2019;69:230-4. Epub 2019/02/11. doi:  
275 10.1016/j.meegid.2019.02.005. PubMed PMID: 30738791.
- 276 8. Gouma S, Cremer J, Parkkali S, Veldhuijzen I, van Binnendijk RS, Koopmans MPG. Mumps virus F gene  
277 and HN gene sequencing as a molecular tool to study mumps virus transmission. *Infect Genet Evol.* 2016;45:145-50.  
278 doi: 10.1016/j.meegid.2016.08.033. PubMed PMID: 27590714.
- 279 9. Barrabeig I, Anton A, Torner N, Pumarola T, Costa J, Dominguez A, et al. Mumps: MMR vaccination and  
280 genetic diversity of mumps virus, 2007-2011 in Catalonia, Spain. *BMC Infect Dis.* 2019;19(1):954. Epub

- 281 2019/11/11. doi: 10.1186/s12879-019-4496-z. PubMed PMID: 31706275; PubMed Central PMCID:  
282 PMCPMC6842476.
- 283 10. Stapleton PJ, Eshaghi A, Seo CY, Wilson S, Harris T, Deeks SL, et al. Evaluating the use of whole genome  
284 sequencing for the investigation of a large mumps outbreak in Ontario, Canada. *Sci Rep.* 2019;9(1):12615. Epub  
285 2019/09/01. doi: 10.1038/s41598-019-47740-1. PubMed PMID: 31471545; PubMed Central PMCID:  
286 PMCPMC6717193.
- 287 11. Moncla L, and the Nextstrain project team. Real-time tracking of mumps virus evolution. Available at:  
288 <https://nextstrain.org/mumps/global>. Site accessed April 21, 2020.
- 289 12. Alkam D, Jenjaroenpun P, Wongsurawat T, Udaondo Z, Patumcharoenpol P, Robeson M, et al. Genomic  
290 characterization of mumps viruses from a large-scale mumps outbreak in Arkansas, 2016. *Infect Genet Evol.*  
291 2019;75:103965. Epub 2019/07/19. doi: 10.1016/j.meegid.2019.103965. PubMed PMID: 31319177; PubMed  
292 Central PMCID: PMCPMC6832845.
- 293 13. Hadfield J, Megill C, Bell SM, Huddleston J, Potter B, Callender C, et al. Nextstrain: real-time tracking of  
294 pathogen evolution. *Bioinformatics.* 2018;34(23):4121-3. Epub 2018/05/24. doi: 10.1093/bioinformatics/bty407.  
295 PubMed PMID: 29790939; PubMed Central PMCID: PMCPMC6247931.
- 296 14. Sagulenko P, Puller V, Neher RA. TreeTime: Maximum-likelihood phylodynamic analysis. *Virus Evol.*  
297 2018;4(1):vex042. Epub 2018/01/18. doi: 10.1093/ve/vex042. PubMed PMID: 29340210; PubMed Central PMCID:  
298 PMCPMC5758920.
- 299 15. Hasan MR, Rawat A, Tang P, Jithesh PV, Thomas E, Tan R, et al. Depletion of Human DNA in Spiked  
300 Clinical Specimens for Improvement of Sensitivity of Pathogen Detection by Next-Generation Sequencing. *J Clin*  
301 *Microbiol.* 2016;54(4):919-27. Epub 2016/01/15. doi: 10.1128/JCM.03050-15. PubMed PMID: 26763966; PubMed  
302 Central PMCID: PMCPMC4809942.
- 303 16. Kumar S, Stecher G, Tamura K. MEGA7: Molecular Evolutionary Genetics Analysis Version 7.0 for  
304 Bigger Datasets. *Mol Biol Evol.* 2016;33(7):1870-4. Epub 2016/03/24. doi: 10.1093/molbev/msw054. PubMed  
305 PMID: 27004904.
- 306 17. National Institute for Public Health and the Environment (RIVM). The National Immunisation Programme  
307 in the Netherlands: Surveillance and developments in 2018-2019. Schurink-van 't Klooster TM, De Melker H,  
308 editors 2019. doi: 10.21945/RIVM-2019-0193.



309 18. Wohl S, Metsky HC, Schaffner SF, Piantadosi A, Burns M, Lewnard JA, et al. Combining genomics and  
310 epidemiology to track mumps virus transmission in the United States. PLoS Biol. 2020;18(2):e3000611. Epub  
311 2020/02/12. doi: 10.1371/journal.pbio.3000611. PubMed PMID: 32045407; PubMed Central PMCID:  
312 PMC7012397.

bioRxiv preprint doi: <https://doi.org/10.1101/2020.04.30.070243>; this version posted April 30, 2020. The copyright holder for this preprint (which was not certified by peer review) is the author/funder, who has granted bioRxiv a license to display the preprint in perpetuity. It is made available under aCC-BY 4.0 International license.

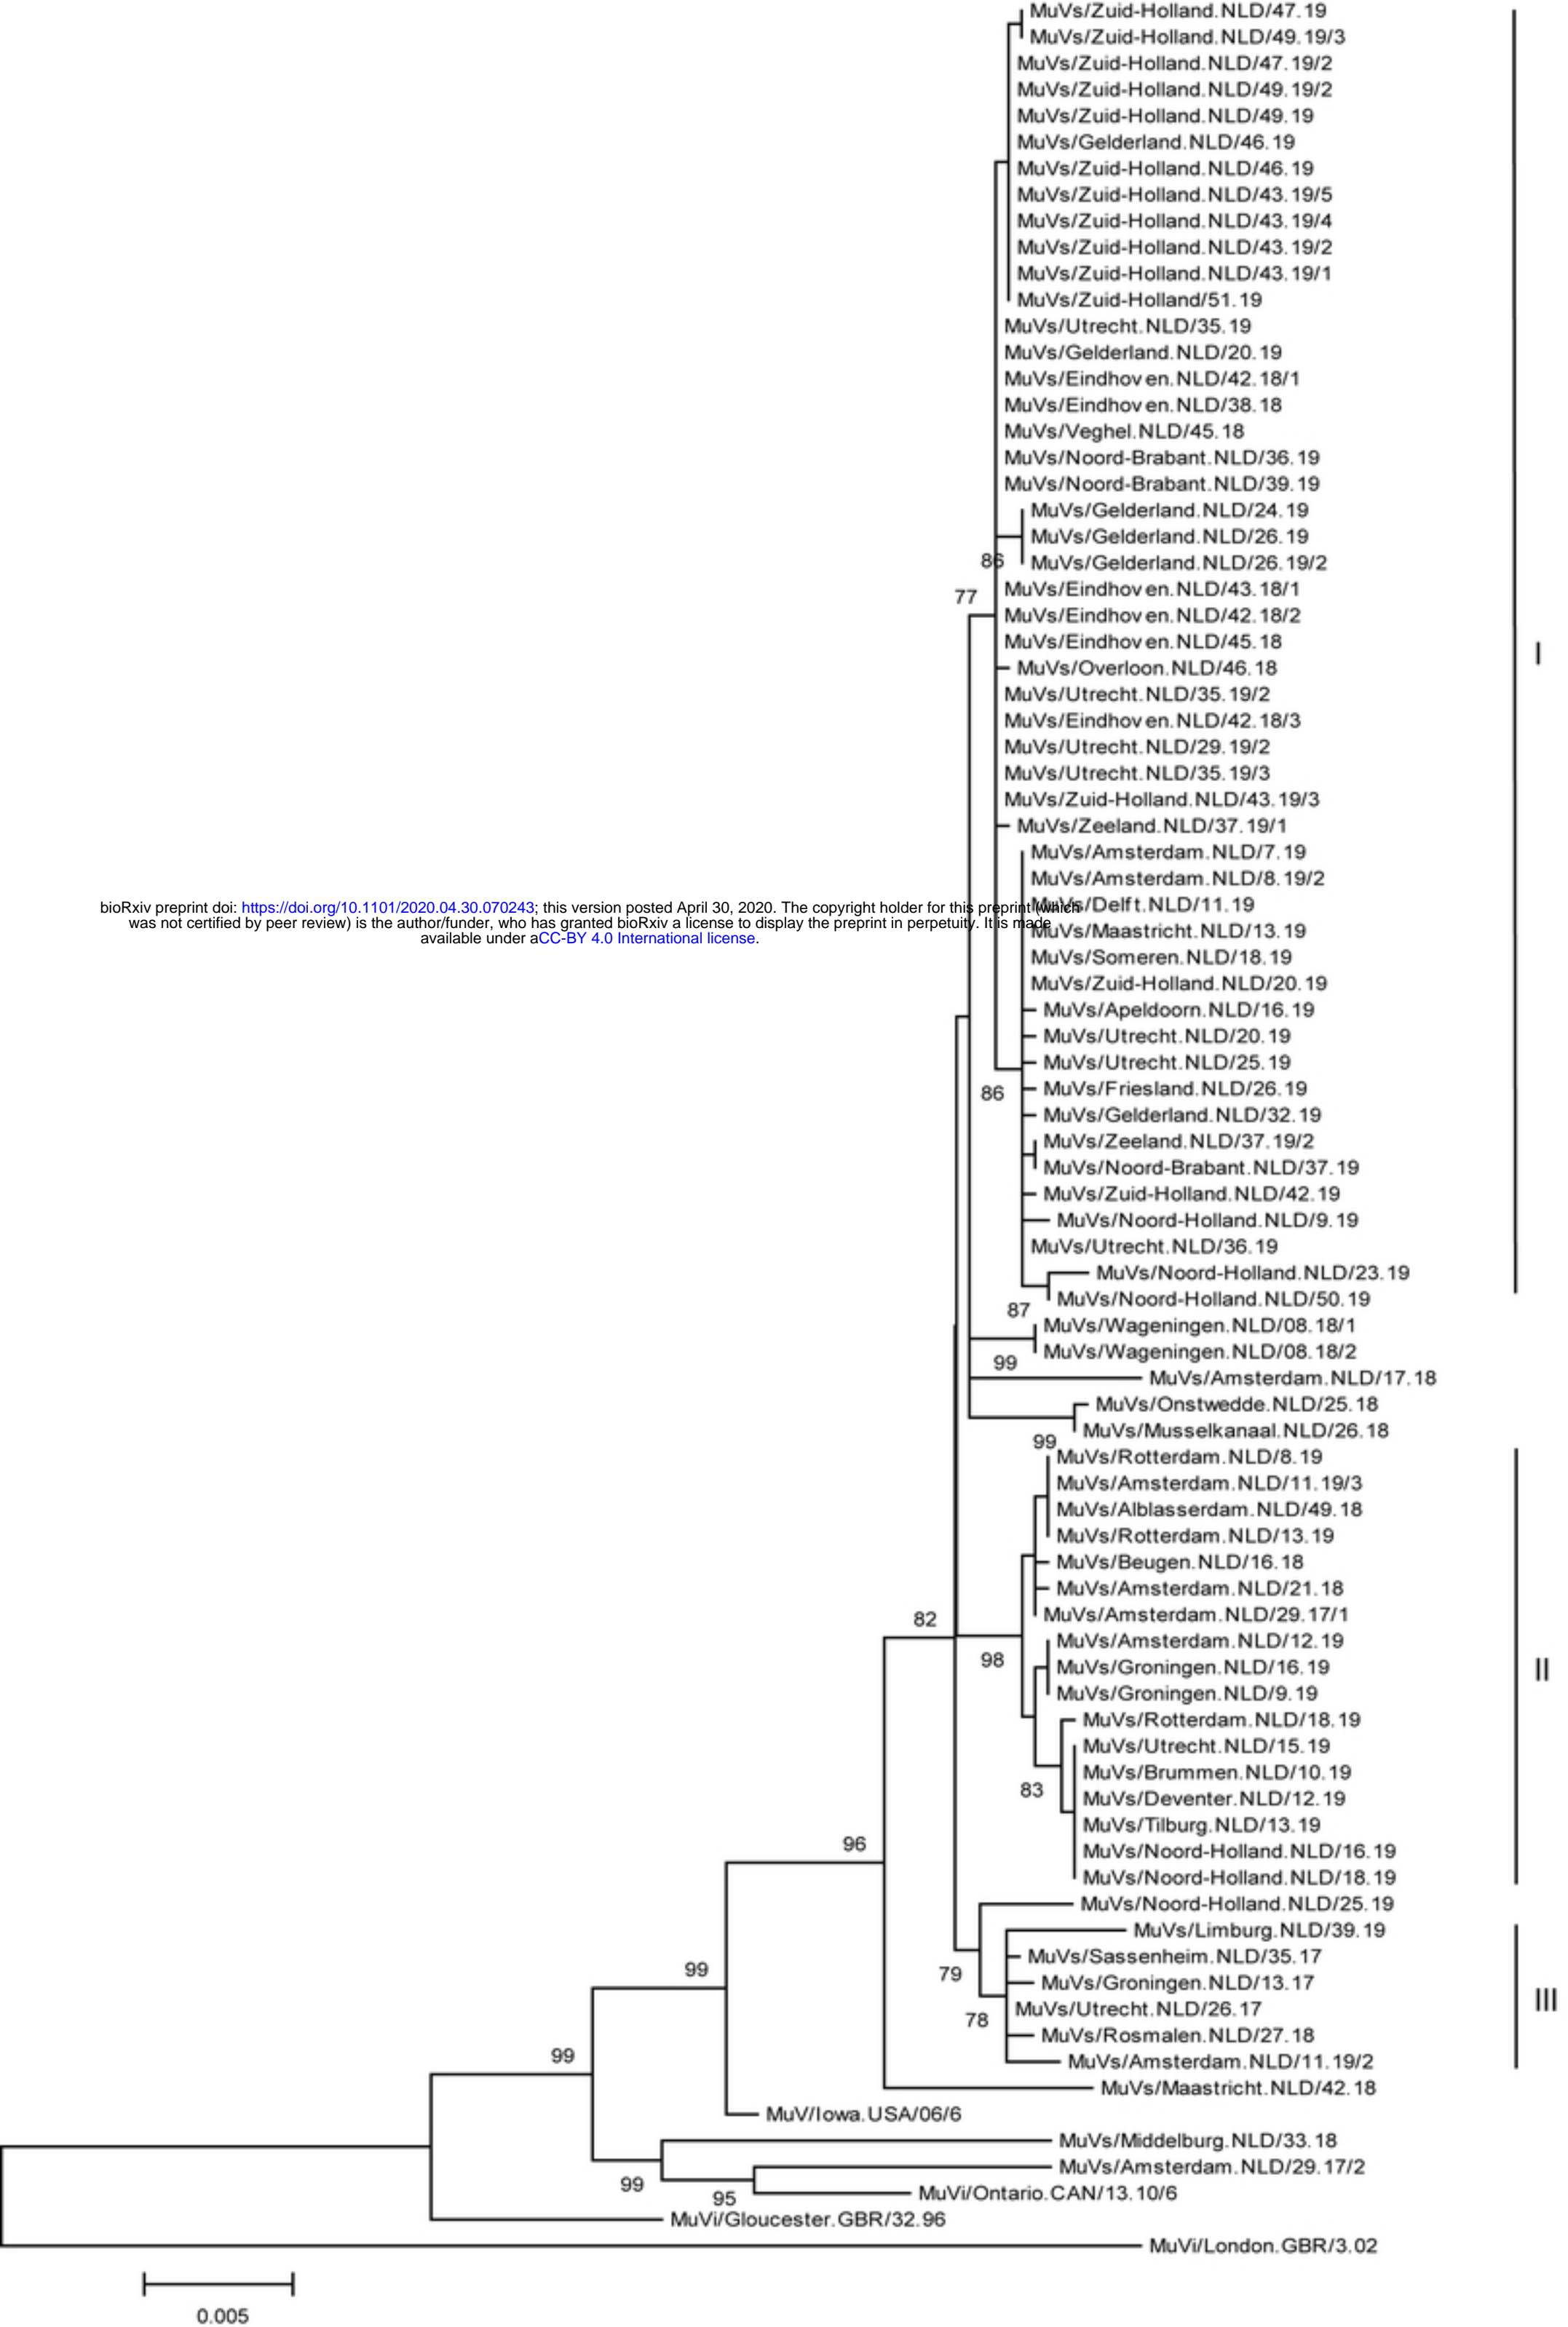

Figure 1

SH + NCRs

Complete genomes

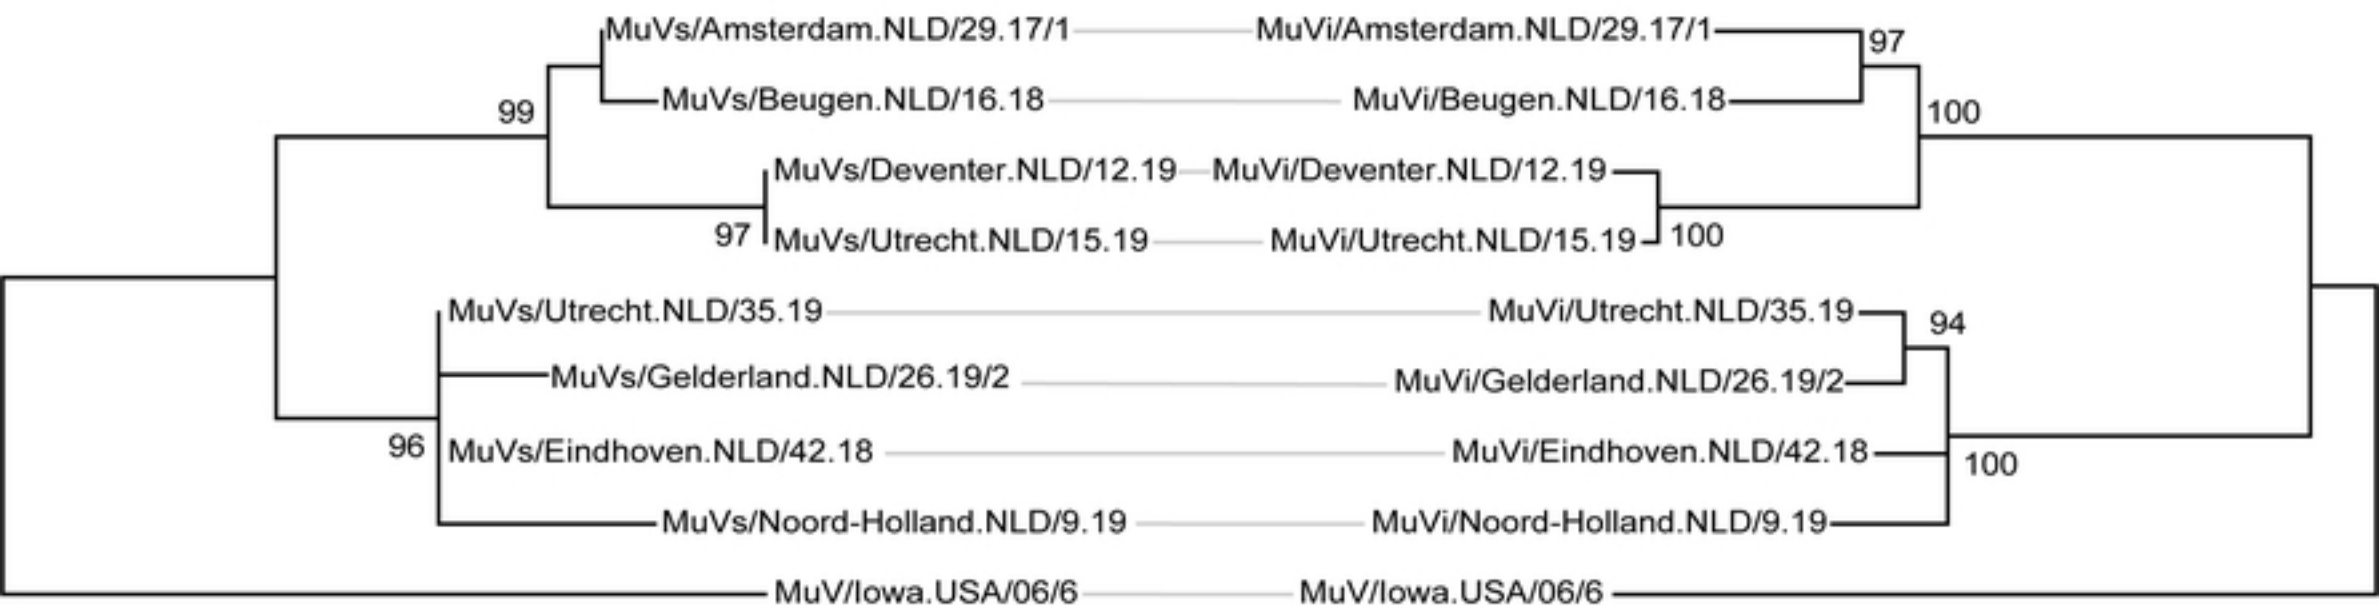

0.0005

0.0005

Figure 2

bioRxiv preprint doi: <https://doi.org/10.1101/2020.04.30.070243>; this version posted April 30, 2020. The copyright holder for this preprint (which was not certified by peer review) is the author/funder, who has granted bioRxiv a license to display the preprint in perpetuity. It is made available under aCC-BY 4.0 International license.

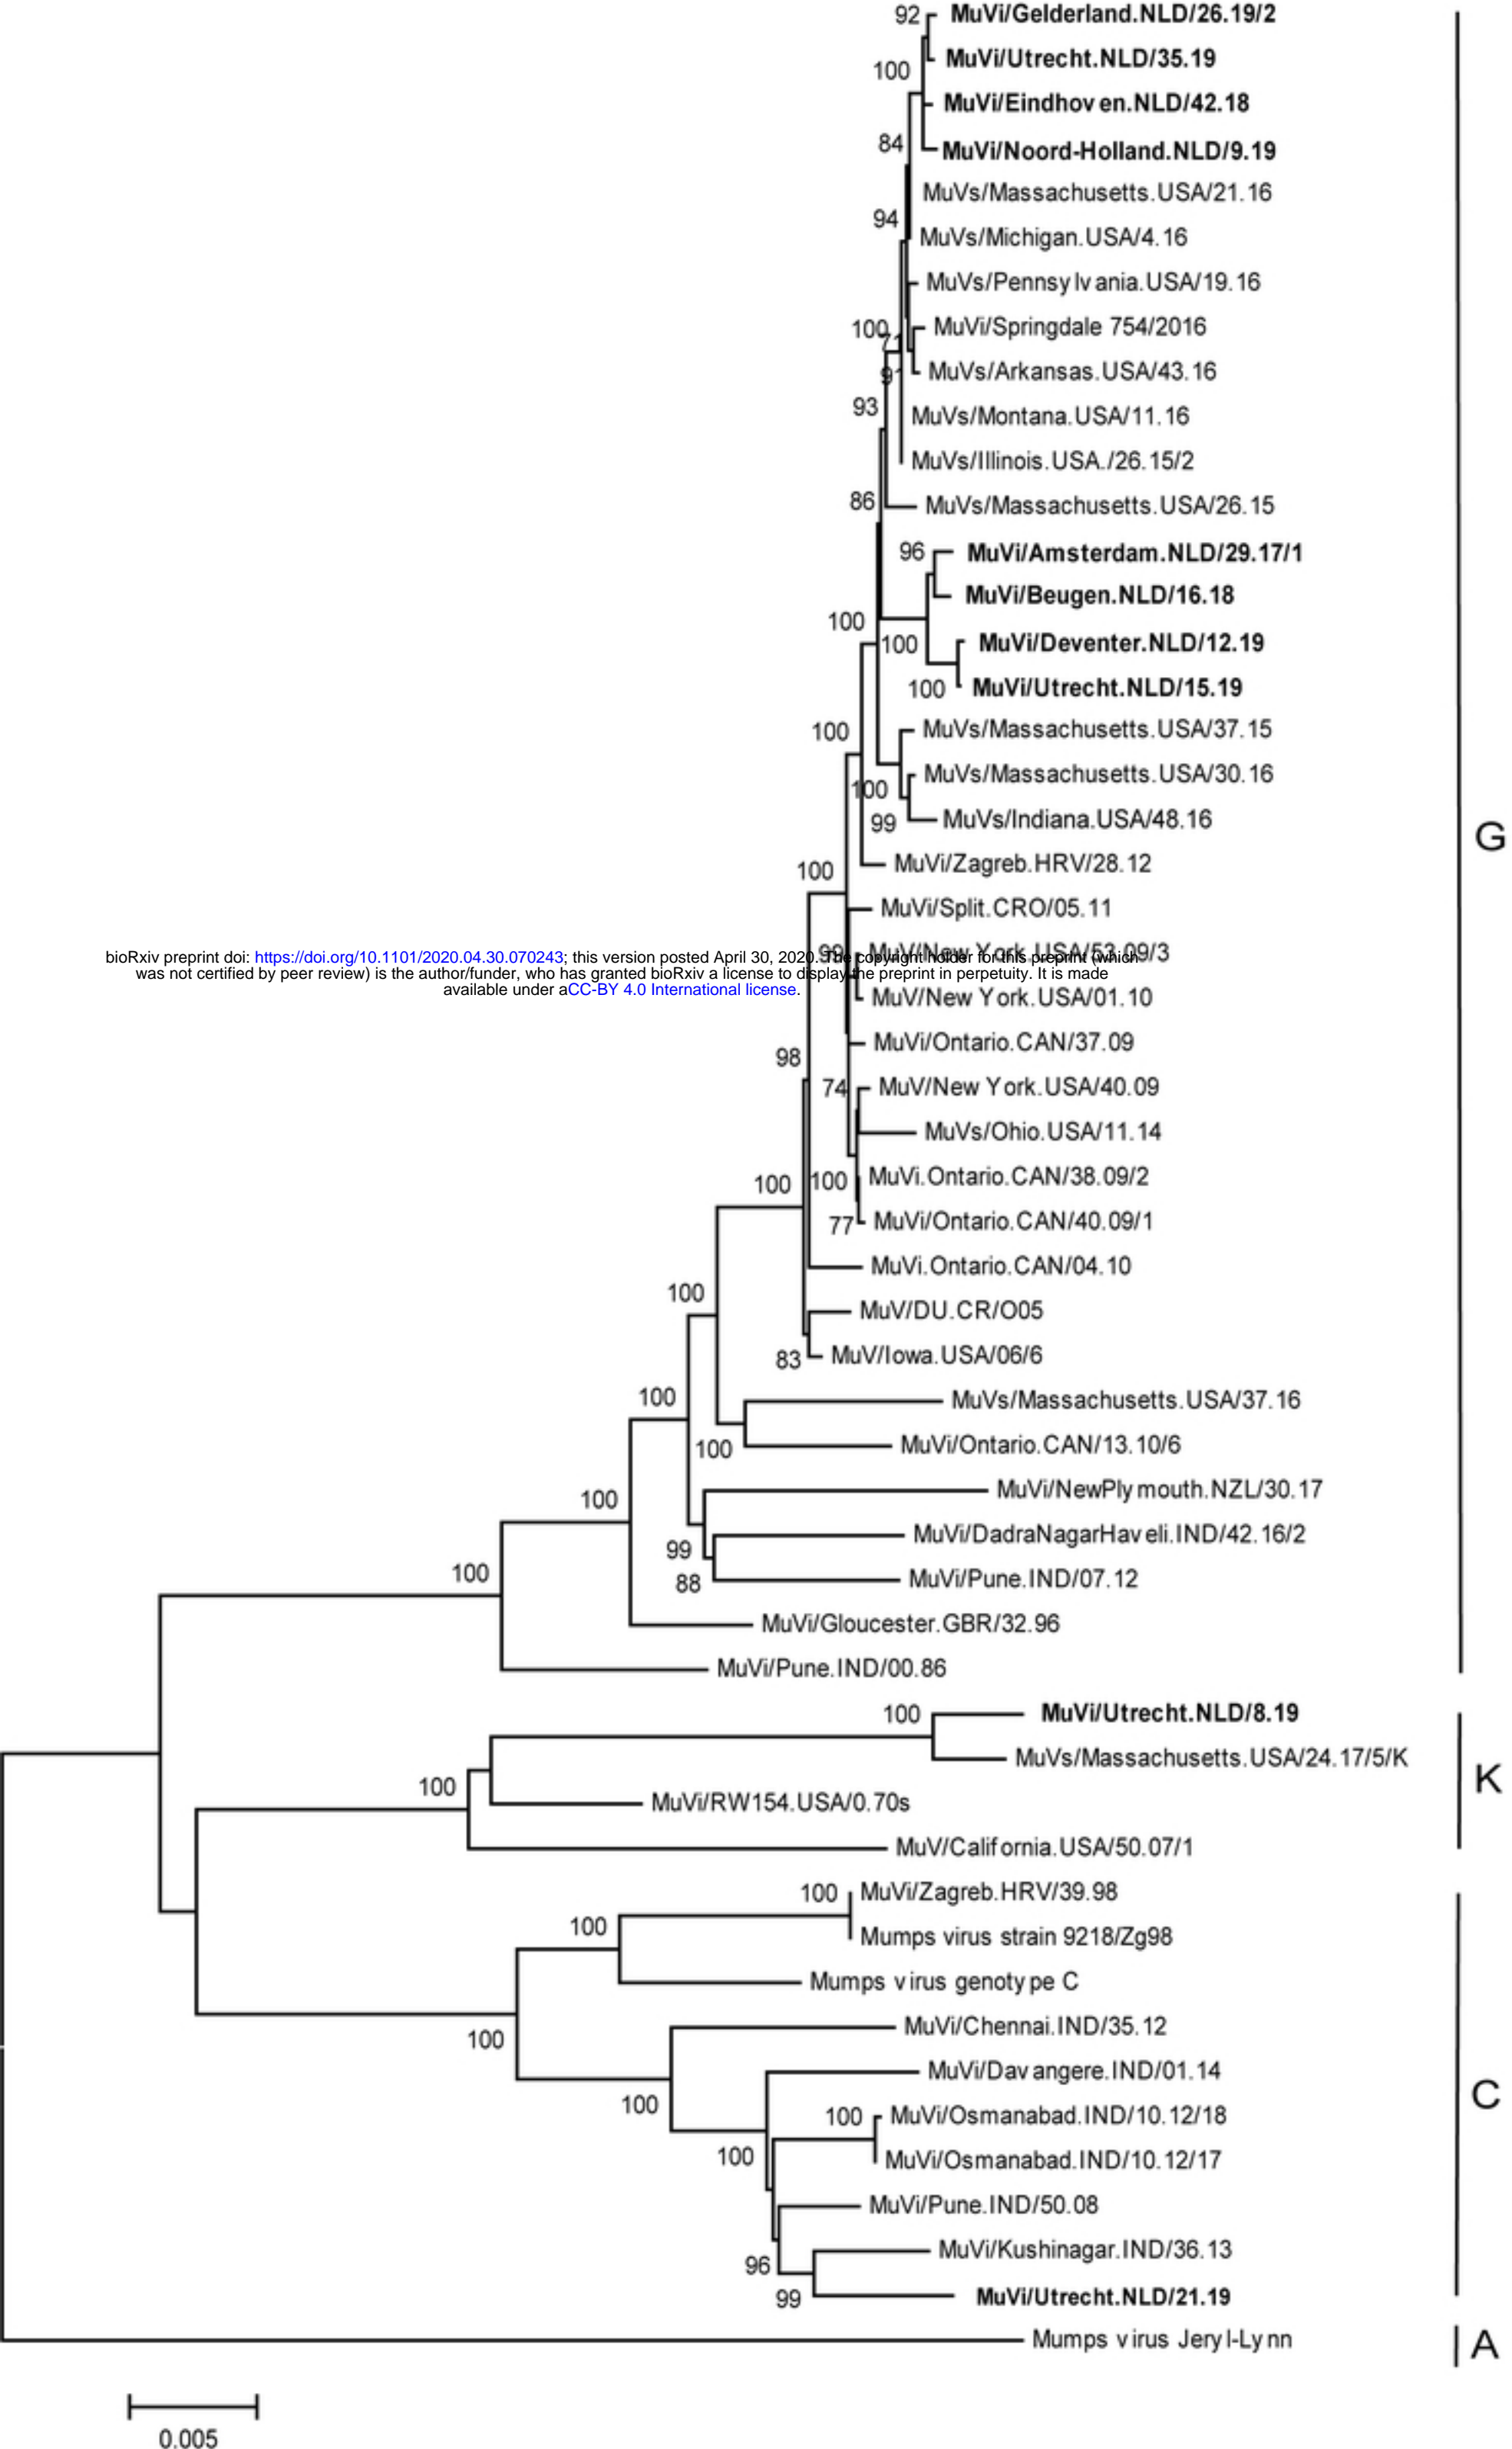

Figure 3
